# Supplementary material for: Where do young men want to access STI screening? A stratified random probability sample survey of young men in Great Britain
Source: HighWire-hosted journal article supplement (doi:10.1136/sextrans-2011-050406), 2012-04-17
Supplement: sextrans-2011-050406-S1.pdf [file sextrans-2011-050406-S1.pdf]

Online supplement (web only file): Participation in sport among men aged 18-35 years

| Factors                                                       | All men<br>(95% CI) | 18-24 years<br>(95% CI) | 25-29 years<br>(95% CI) | 30-35 years<br>(95% CI) | p-value |
|---------------------------------------------------------------|---------------------|-------------------------|-------------------------|-------------------------|---------|
| <i>Participation in sport:</i>                                |                     |                         |                         |                         |         |
| <b>Taken part in sport/ physical activity in last 4 weeks</b> | 69.4% (63.9-74.5)   | 68.3% (58.7-76.6)       | 62.5% (52.1-71.8)       | 78.3% (69.7-84.9)       | 0.0637  |
| <b>Activities taken part in</b>                               |                     |                         |                         |                         |         |
| Football                                                      | 52.9% (46.2-59.5)   | 59.2% (47.6-69.9)       | 55.0% (43.5-66.0)       | 43.3% (33.1-54.0)       | 0.1052  |
| Jogging                                                       | 45.4% (38.7-52.2)   | 43.6% (32.4-55.5)       | 42.0% (30.8-54.0)       | 50.4% (39.8-60.9)       | 0.5599  |
| Gym/ Health club                                              | 36.8% (30.3-43.8)   | 37.4% (26.5-49.7)       | 43.7% (31.6-56.5)       | 30.2% (21.2-41.0)       | 0.2964  |
| Cycling                                                       | 31.9% (26.0-38.6)   | 35.3% (25.1-47.0)       | 20.8% (13.0-31.6)       | 37.1% (27.2-48.2)       | 0.0878  |
| Swimming                                                      | 29.6% (23.9-35.9)   | 30.8% (21.0-42.8)       | 34.6% (23.5-47.7)       | 23.9% (16.3-33.5)       | 0.4029  |
| Martial Arts                                                  | 7.7% (4.5-12.7)     | 13.2% (6.8-24.1)        | 2.8% (0.7-10.6)         | 5.0% (4.5-12.7)         | 0.0386  |
| Athletics                                                     | 6.6% (3.9-11.1)     | 9.8% (4.7-19.3)         | 5.3% (2.0-13.8)         | 3.8% (1.5-9.2)          | 0.2070  |
| Badminton                                                     | 6.0% (3.5-10.3)     | 8.6% (3.8-18.4)         | 5.6% (2.1-13.8)         | 3.3% (1.2-8.8)          | 0.3110  |
| Cricket                                                       | 5.9% (3.1-11.2)     | 11.2% (5.5-21.6)        | 5.2% (1.1-21.1)         | 0%                      | 0.0572  |
| Boxing                                                        | 5.5% (3.2-9.3)      | 5.4% (2.0-13.8)         | 7.8% (3.5-16.7)         | 3.7% (1.2-10.1)         | 0.5539  |
| Tennis                                                        | 5.3% (2.7-10.1)     | 4.7% (1.5-13.3)         | 6.9% (2.0-21.1)         | 4.7% (1.6-13.5)         | 0.8488  |
| Basketball                                                    | 3.2% (1.5-6.5))     | 6.2% (2.6-13.8))        | 0%                      | 2.1% (0.5-8.1)          | 0.0701  |
| Rowing                                                        | 2.5% (1.0-5.9)      | 3.0% (0.6-12.9)         | 2.6% (0.8-8.4)          | 1.7% (0.4-7.2)          | 0.8304  |
| Rugby union                                                   | 1.7% (0.7-4.1)      | 0.9% (0.1-6.5)          | 1.9% (0.4-7.9)          | 2.5% (0.6-9.4)          | 0.6912  |
| Rugby league                                                  | 1.8% (0.7-4.6)      | 3.5% (1.1-10.3)         | 1.3% (0.2-8.5)          | 0%                      | 0.1916  |
| Hockey (field)                                                | 1.6% (0.4-5.7)      | 3.5% (0.8-13.6)         | 0.6% (0.0-4.5)          | 0%                      | 0.1793  |
| Other                                                         | 12.6% (8.7-17.7)    | 13.5% (7.3-23.5)        | 12.4% (6.3-22.9)        | 11.6% (6.6-19.7)        | 0.9327  |
| <b>Frequency of that activity in the last 4 weeks</b>         |                     |                         |                         |                         |         |
| <b>Football</b>                                               |                     |                         |                         |                         | 0.3408  |
| Every day                                                     | 4.5% (1.8-10.6)     | 8.1% (2.9-20.5)         | 0%                      | 3.1% (0.4-19.6)         |         |
| Not every day but >once a week                                | 31.1% (22.8-40.7)   | 32.4% (20.3-47.5)       | 40.1% (24.4-58.2)       | 19.3% (9.3-35.8)        |         |
| Once a week                                                   | 38.9% (29.9-48.6)   | 34.9% (21.7-50.8)       | 41.0% (26.0-57.8)       | 43.4% (28.2-59.9)       |         |
| Less than once a week but >once a month                       | 14.3% (8.8-22.4)    | 16.4% (7.6-31.8)        | 6.2% (1.9-18.4)         | 19.3% (9.3-35.7)        |         |

|                                                              |                   |                   |                   |                   |        |
|--------------------------------------------------------------|-------------------|-------------------|-------------------|-------------------|--------|
| Once a month                                                 | 11.3% (6.5-18.9)  | 8.3% (3.3-19.7)   | 12.7% (5.0-28.6)  | 14.9% (6.5-30.7)  |        |
| <b>Jogging</b>                                               |                   |                   |                   |                   | 0.0285 |
| Every day                                                    | 8.5% (4.1-16.9)   | 13.7% (4.9-33.0)  | 5.6% (1.4-20.5)   | 5.1% (1.5-15.7)   |        |
| Not every day but >once a week                               | 46.8% (37.2-56.7) | 34.5% (20.4-52.0) | 47.6% (31.1-64.7) | 59.6% (44.5-73.1) |        |
| Once a week                                                  | 18.7% (11.9-28.2) | 14.5% (5.7-32.4)  | 30.8% (16.3-50.4) | 14.9% (6.9-29.3)  |        |
| Less than once a week but >once a month                      | 17.6% (10.7-27.4) | 32.0% (17.4-51.1) | 3.9% (0.5-23.7)   | 11.6% (5.2-23.6)  |        |
| Once a month                                                 | 8.3% (4.5-14.9)   | 5.4% (1.3-19.8)   | 12.1% (4.6-28.4)  | 8.9% (4.5-14.9)   |        |
| <b>Gym/ health club</b>                                      |                   |                   |                   |                   | 0.2757 |
| Every day                                                    | 13.5% (7.7-22.8)  | 18.6% (7.9-37.7)  | 15.2% (6.7-31.0)  | 3.8% (0.5-23.6)   |        |
| Not every day but >once a week                               | 60.7% (49.3-71.1) | 47.3% (28.0-67.6) | 74.4% (56.5-86.7) | 64.9% (44.5-81.0) |        |
| Once a week                                                  | 10.4% (5.3-19.3)  | 10.3% (3.4-26.9)  | 5.5% (1.2-21.6)   | 16.4% (5.7-38.7)  |        |
| Less than once a week but >once a month                      | 10.5% (5.1-20.4)  | 15.8% (5.5-37.5)  | 3.3% (0.5-19.1)   | 11.0% (3.8-27.7)  |        |
| Once a month                                                 | 4.9% (1.7-13.3)   | 8.1% (1.9-28.1)   | 1.6% (0.2-11.1)   | 3.9% (0.5-24.0)   |        |
| <b>Cycling</b>                                               |                   |                   |                   |                   | 0.8358 |
| Every day                                                    | 20.4% (12.2-32.1) | 21.7% (9.3-42.9)  | 12.6% (3.1-39.6)  | 22.5% (10.6-41.6) |        |
| Not every day but >once a week                               | 29.9% (20.2-41.9) | 30.3% (15.1-51.6) | 25.3% (10.2-50.3) | 31.5% (17.7-49.7) |        |
| Once a week                                                  | 13.9% (7.8-23.5)  | 6.5% (1.5-24.5)   | 23.0% (8.3-49.6)  | 18.4% (8.6-35.2)  |        |
| Less than once a week but >once a month                      | 23.1% (13.8-35.9) | 27.1% (11.6-51.5) | 28.2% (11.2-55.0) | 15.9% (7.3-31.0)  |        |
| Once a month                                                 | 12.7% (6.2-24.5)  | 14.4% (4.5-37.3)  | 10.9% (2.3-38.4)  | 11.7% (3.8-30.6)  |        |
| <b>Swimming</b>                                              |                   |                   |                   |                   | 0.2397 |
| Every day                                                    | 2.4% (0.6-9.6)    | 3.0% (0.4-19.6)   | 3.7% (0.5-23.1)   | 0%                |        |
| Not every day but >once a week                               | 13.4% (7.3-23.4)  | 7.0% (1.7-25.1)   | 12.8% (4.8-30.0)  | 24.5% (10.1-48.5) |        |
| Once a week                                                  | 23.5% (13.9-36.8) | 19.7% (7.5-42.5)  | 22.8% (9.6-45.3)  | 30.4% (14.2-53.7) |        |
| Less than once a week but >once a month                      | 36.2% (24.9-49.3) | 30.6% (14.8-52.9) | 47.3% (28.1-67.4) | 31.7% (14.7-55.5) |        |
| Once a month                                                 | 24.5% (15.1-37.2) | 39.8% (21.3-61.7) | 13.4% (5.7-28.3)  | 13.4% (4.2-35.4)  |        |
| <b>Acceptable to pick up urine test at place of activity</b> | 48.3% (42.4-54.1) | 48.3% (38.6-58.2) | 40.2% (31.1-50.1) | 56.4% (46.8-65.6) | 0.0884 |
| <b>Acceptable to pick up mouth swab from that place</b>      | 46.9% (41.3-52.6) | 47.3% (38.0-56.7) | 43.1% (33.8-53.0) | 50.3% (40.8-59.9) | 0.6079 |

Online supplement (web only file): Healthcare use, sexual behaviour and participation in sport among those who did and did not play football over the last 4 weeks.

| Factors                                                | All men<br>(95% CI) | Footballers<br>(95% CI) | Non-Footballers<br>(95% CI) | <i>p</i> -value |
|--------------------------------------------------------|---------------------|-------------------------|-----------------------------|-----------------|
| <i>Demographic factors:</i>                            |                     |                         |                             |                 |
| <b>Age</b>                                             |                     |                         |                             |                 |
| Median (lower, upper quartiles)                        |                     |                         |                             |                 |
| 18-24 years                                            | 38.9% (246)         |                         |                             |                 |
| 25-29 years                                            | 28.2% (178)         |                         |                             |                 |
| 30-35 years                                            | 32.9% (208)         |                         |                             |                 |
| <i>Health service use:</i>                             |                     |                         |                             |                 |
| <b>Registered with a general practice (GP) surgery</b> | 93.5% (90.2-95.7)   | 91.7% (84.0-95.9)       | 94.5% (91.1-96.7)           | 0.3468          |
| <b>Been to GP in the last 12 months</b>                | 75.5% (70.5-80.0)   | 71.8% (62.4-79.6)       | 77.7% (71.8-82.7)           | 0.2413          |
| <b>Ever been tested for a STI</b>                      | 28.8% (24.0-34.2)   | 30.9% (23.4-39.6)       | 27.6% (21.9-34.2)           | 0.5009          |
| <b>Time since last STI test</b>                        |                     |                         |                             | 0.5700          |
| Less than 1 month ago                                  | 4.4% (1.6-11.8)     | 4.6% (1.1-17.2)         | 4.3% (1.0-16.7)             |                 |
| >1 month but <6 months                                 | 10.0% (5.4-17.9)    | 15.3% (6.7-31.2)        | 6.6% (2.6-15.9)             |                 |
| >6 months but <1 year                                  | 25.2% (17.1-35.6)   | 24.5% (12.5-42.6)       | 25.7% (15.2-40.0)           |                 |
| >1 year but <5 years                                   | 37.0% (28.7-46.1)   | 38.9% (25.3-54.6)       | 35.7% (25.0-48.0)           |                 |
| >5 years ago                                           | 23.4% (16.3-32.3)   | 16.6% (8.4-30.2)        | 27.8% (17.9-40.3)           |                 |
| <b>Where were you last tested for STIs</b>             |                     |                         |                             | 0.4537          |
| GUM clinic                                             | 53.4% (43.5-63.1)   | 49.8% (34.4-65.2)       | 55.8% (42.4-68.4)           |                 |
| GP surgery                                             | 17.0% (9.1-29.5)    | 17.3% (8.6-32.0)        | 17.0% (9.1-29.5)            |                 |
| NHS walk-in centre                                     | 8.3% (3.3-19.0)     | 8.5% (2.1-28.9)         | 8.1% (2.4-24.0)             |                 |
| Family planning clinic                                 | 6.6% (2.9-14.5)     | 10.5% (4.1-24.7)        | 4.1% (0.8-17.9)             |                 |
| University/ college health centre                      | 4.4% (1.5-12.2)     | 0.0%                    | 7.4% (2.5-19.5)             |                 |
| Private medical clinic                                 | 1.7% (0.5-5.5)      | 1.6% (0.2-10.6)         | 1.9% (0.4-7.6)              |                 |
| Pharmacy                                               | 0.9% (0.1-6.6)      | 2.4% (0.3-15.4)         | 0.0%                        |                 |

|                                         | Internet test                     | 1.1% (0.2-7.9)      | 2.9% (0.4-18.3)         | 0.0%                        |         |
|-----------------------------------------|-----------------------------------|---------------------|-------------------------|-----------------------------|---------|
|                                         | A&E department                    | 1.3% (0.3-5.4)      | 3.3% (0.8-13.2)         | 0.0%                        |         |
|                                         | Somewhere else                    | 5.0% (2.0-12.0)     | 3.8% (0.5-23.1)         | 5.8% (2.2-14.6)             |         |
| Factors                                 |                                   | All men<br>(95% CI) | Footballers<br>(95% CI) | Non-Footballers<br>(95% CI) | p-value |
| Ever had a blood test for HIV           |                                   | 19.8% (15.8-24.6)   | 22.7% (15.6-31.9)       | 18.1% (13.5-23.9)           | 0.3430  |
| Time since last HIV test                |                                   |                     |                         |                             | 0.1543  |
|                                         | Less than 1 month ago             | 10.4% (4.3-23.2)    | 18.7% (6.5-43.3)        | 4.4% (1.1-16.5)             |         |
|                                         | >1 month but <6 months            | 11.1% (5.0-22.8)    | 17.9% (6.6-40.4)        | 6.1% (1.7-19.5)             |         |
|                                         | >6 months but <1 year             | 14.7% (7.1-27.9)    | 10.9% (2.5-36.5)        | 17.4% (7.5-35.6)            |         |
|                                         | >1 year but <5 years              | 37.7% (26.3-50.7)   | 24.8% (11.4-45.8)       | 47.2% (31.7-63.3)           |         |
|                                         | >5 years ago                      | 26.1% (17.0-37.9)   | 27.8% (13.9-48.0)       | 24.9% (13.7-40.7)           |         |
| Where were you last tested for HIV      |                                   |                     |                         |                             | 0.6670  |
|                                         | GUM clinic                        | 50.8% (38.2-63.4)   | 53.6% (32.7-73.4)       | 48.8% (33.1-64.7)           |         |
|                                         | GP surgery                        | 16.0% (8.1-29.3)    | 19.6% (6.9-43.7)        | 13.8% (5.5-29.9)            |         |
|                                         | Family planning clinic            | 6.7% (2.8-15.2)     | 8.2% (2.0-28.6)         | 5.2% (1.5-15.9)             |         |
|                                         | Private medical clinic            | 5.7% (1.8-16.6)     | 6.6% (0.9-35.4)         | 5.1% (1.5-15.9)             |         |
|                                         | NHS walk-in centre                | 4.4% (1.0-17.6)     | 7.1% (1.0-37.3)         | 2.5% (0.3-16.0)             |         |
|                                         | University/ college health centre | 4.1% (1.2-12.8)     | 0.0%                    | 7.1% (2.2-21.1)             |         |
|                                         | A&E department                    | 1.2% (0.2-8.2)      | 0.0%                    | 2.0% (0.3-13.6)             |         |
|                                         | Somewhere else                    | 11.0% (5.4-21.0)    | 5.2% (0.7-30.0)         | 15.3% (7.4-28.8)            |         |
| <i>Behavioural factors:</i>             |                                   |                     |                         |                             |         |
| Number of partners in the last year     |                                   |                     |                         |                             | 0.0814  |
|                                         | 0                                 | 13.8% (10.1-18.7)   | 10.1% (5.3-18.4)        | 16.0% (11.1-22.5)           |         |
|                                         | 1                                 | 61.4% (55.8-66.6)   | 59.1% (49.7-67.8)       | 62.7% (55.5-69.3)           |         |
|                                         | 2                                 | 8.9% (6.2-12.5)     | 8.5% (4.5-15.4)         | 9.1% (5.9-13.8)             |         |
|                                         | 3-4                               | 8.0% (5.3-11.9)     | 13.5% (7.9-22.4)        | 4.8% (2.6-8.8)              |         |
|                                         | 5+                                | 8.0% (5.3-11.9)     | 8.8% (4.6-16.1)         | 7.5% (4.4-12.4)             |         |
| Number of partners in the last 3 months |                                   |                     |                         |                             | 0.9899  |
|                                         | 0                                 | 26.6% (21.4-32.6)   | 25.7% (17.4-36.2)       | 27.1% (20.9-34.5)           |         |
|                                         | 1                                 | 65.4% (59.3-70.9)   | 66.2% (55.7-75.3)       | 64.9% (57.7-71.4)           |         |

|                                                              | 2                          | 2.9% (1.6-5.3)      | 2.8% (1.0-8.0)          | 3.0% (1.4-6.1)              |         |
|--------------------------------------------------------------|----------------------------|---------------------|-------------------------|-----------------------------|---------|
|                                                              | 3-4                        | 3.4% (1.8-6.3)      | 3.1% (1.1-8.3)          | 3.5% (1.6-7.7)              |         |
|                                                              | 5+                         | 1.8% (0.7-4.5)      | 2.2% (0.5-8.4)          | 1.5% (0.4-5.4)              |         |
| Factors                                                      |                            | All men<br>(95% CI) | Footballers<br>(95% CI) | Non-Footballers<br>(95% CI) | p-value |
| <b>Gender of last sexual partner</b>                         |                            |                     |                         |                             |         |
|                                                              | Male                       | 3.5% (2.0-6.1)      | 1.3% (0.3-6.3)          | 4.8% (2.7-8.6)              | 0.350   |
|                                                              | Female                     | 90.5% (86.1-93.6)   | 92.7% (84.3-96.8)       | 89.4% (83.4-93.1)           |         |
|                                                              | Never had sex              | 6.0% (3.5-10.1)     | 6.0% (2.4-14.5)         | 6.0% (3.1-11.3)             |         |
| <b>Condom use in last 3 months</b>                           |                            |                     |                         |                             |         |
|                                                              | Every time                 | 26.9% (21.3-33.4)   | 27.7% (18.9-38.7)       | 26.4% (19.6-34.5)           | 0.8757  |
|                                                              | Sometimes                  | 24.7% (19.4-31.0)   | 26.1% (17.6-36.8)       | 23.9% (17.7-31.6)           |         |
|                                                              | Not at all                 | 48.4% (41.8-55.0)   | 46.2% (35.1-57.6)       | 49.7% (41.8-57.6)           |         |
| <i>Willingness to use novel methods for testing:</i>         |                            |                     |                         |                             |         |
| <b>Willing to provide urine sample for STI testing</b>       |                            | 85.1% (80.5-88.8)   | 88.6% (80.8-93.4)       | 83.1% (76.9-87.9)           | 0.2244  |
| <b>Willing to provide mouth swab for HIV testing</b>         |                            | 86.9% (82.4-90.4)   | 90.2% (82.2-94.8)       | 85.1% (79.1-89.5)           | 0.2320  |
| <b>Acceptable to pick up urine test at place of activity</b> |                            | 48.3% (42.4-54.1)   | 47.3% (37.2-57.5)       | 48.8% (41.8-55.9)           | .8014   |
| <b>Acceptable to pick up mouth swab from that place</b>      |                            | 46.9% (41.3-52.6)   | 43.5% (34.2-53.2)       | 48.9% (41.8-56.1)           | 0.3827  |
| <b>Acceptable pick up points for testing kits</b>            |                            |                     |                         |                             |         |
|                                                              | General Practice surgery   | 79.7% (74.5-84.2)   | 78.2% (69.1-85.2)       | 80.6% (74.2-85.8)           | 0.6167  |
|                                                              | GUM clinic                 | 66.8% (60.8-72.3)   | 65.6% (55.7-74.3)       | 67.5% (60.0-74.2)           | 0.7518  |
|                                                              | Pharmacy                   | 65.4% (59.4-71.0)   | 63.5% (53.4-72.5)       | 66.6% (59.0-73.4)           | 0.6108  |
|                                                              | Sent in the post           | 52.2% (46.4-58.0)   | 55.9% (46.2-65.1)       | 50.1% (42.5-57.7)           | 0.3699  |
|                                                              | College/ University campus | 41.6% (35.9-47.6)   | 54.1% (43.9-63.9)       | 34.4% (27.7-41.7)           | 0.0024  |
|                                                              | School                     | 28.1% (23.0-33.8)   | 34.4% (25.6-44.5)       | 24.4% (18.6-31.3)           | 0.0834  |
|                                                              | Workplace                  | 22.4% (17.8-27.8)   | 26.0% (18.0-36.0)       | 20.2% (15.1-26.6)           | 0.2693  |
|                                                              | Youth club                 | 20.8% (16.3-26.2)   | 31.3% (22.7-41.4)       | 14.7% (10.2-20.7)           | 0.0013  |
|                                                              | Gym                        | 18.5% (14.5-23.4)   | 23.2% (15.8-32.7)       | 15.9% (11.4-21.7)           | 0.1368  |
|                                                              | Bar/ pub/ nightclub        | 17.3% (13.3-22.3)   | 18.8% (12.2-27.8)       | 16.5% (11.7-22.7)           | 0.6263  |

|                                                               |                             |                                 |                                     |                |
|---------------------------------------------------------------|-----------------------------|---------------------------------|-------------------------------------|----------------|
| Recreational/ leisure/ sport centre/ swimming pool            | 13.4% (9.9-17.9)            | 16.3% (10.4-24.7)               | 11.7% (7.9-17.0)                    | 0.2436         |
| Sports club                                                   | 11.7% (8.4-16.1)            | 11.9% (6.7-20.3)                | 11.5% (7.7-16.9)                    | 0.9298         |
| Coffee shop/ café                                             | 6.9% (4.6-10.3)             | 7.4% (3.8-14.0)                 | 6.6% (3.9-10.9)                     | 0.7778         |
| Other                                                         | 0.4% (0.0-3.0)              | 0.0%                            | 0.7% (0.0-4.6)                      | 0.4438         |
| <b>Factors</b>                                                | <b>All men<br/>(95% CI)</b> | <b>Footballers<br/>(95% CI)</b> | <b>Non-Footballers<br/>(95% CI)</b> | <b>p-value</b> |
| <i>Participation in sport:</i>                                |                             |                                 |                                     |                |
| <b>Taken part in sport/ physical activity in last 4 weeks</b> | 69.4% (63.9-74.5)           | 100%                            | 51.7% (44.7-58.7)                   | <0.0001        |
| <b>Activities taken part in</b>                               |                             |                                 |                                     |                |
| Football                                                      | 52.9% (46.2-59.5)           | 100%                            | 0%                                  | <0.0001        |
| Jogging                                                       | 45.4% (38.7-52.2)           | 46.8% (37.0-56.8)               | 43.8% (34.4-53.6)                   | 0.6816         |
| Gym/ Health club                                              | 36.8% (30.3-43.8)           | 32.0% (23.4-42.0)               | 42.1% (32.9-51.9)                   | 0.1355         |
| Cycling                                                       | 31.9% (26.0-38.6)           | 34.6% (26.5-43.8)               | 28.9% (21.0-38.3)                   | 0.3560         |
| Swimming                                                      | 29.6% (23.9-35.9)           | 24.1% (17.1-32.8)               | 35.8% (27.5-45.0)                   | 0.0519         |
| Martial Arts                                                  | 7.7% (4.5-12.7)             | 4.4% (1.6-11.7)                 | 11.3% (6.1-20.1)                    | 0.0999         |
| Athletics                                                     | 6.6% (3.9-11.1)             | 7.8% (4.2-14.3)                 | 5.3% (2.1-12.8)                     | 0.4770         |
| Badminton                                                     | 6.0% (3.5-10.3)             | 7.4% (3.6-14.7)                 | 4.5% (1.9-10.2)                     | 0.3640         |
| Cricket                                                       | 5.9% (3.1-11.2)             | 6.6% (2.7-15.4)                 | 5.2% (1.9-13.2)                     | 0.7112         |
| Boxing                                                        | 5.5% (3.2-9.3)              | 6.4% (3.1-12.6)                 | 4.5% (1.9-10.3)                     | 0.5484         |
| Tennis                                                        | 5.3% (2.7-10.1)             | 8.5% (4.0-17.1)                 | 1.7% (0.5-5.8)                      | 0.0154         |
| Basketball                                                    | 3.2% (1.5-6.5)              | 4.9% (2.2-10.9)                 | 1.2% (0.3-4.9)                      | 0.0685         |
| Rowing                                                        | 2.5% (1.0-5.9)              | 2.9% (0.8-10.0)                 | 2.0% (0.7-5.5)                      | 0.6224         |
| Rugby union                                                   | 1.7% (0.7-4.1)              | 2.9% (1.1-7.6)                  | 0.4% (0.0-2.6)                      | 0.0311         |
| Rugby league                                                  | 1.8% (0.7-4.6)              | 1.5% (0.4-6.1)                  | 2.0% (0.5-7.8)                      | 0.7974         |
| Hockey (field)                                                | 1.6% (0.4-5.7)              | 2.7% (0.6-10.5)                 | 0.4% (0.0-2.6)                      | 0.0615         |
| Other                                                         | 12.6% (8.8-17.7)            | 5.4% (2.3-12.5)                 | 20.6% (14.1-29.0)                   | 0.0019         |
| <b>Frequency of that activity in the last 4 weeks</b>         |                             |                                 |                                     |                |
| <b>Football</b>                                               |                             |                                 |                                     |                |
| Every day                                                     |                             | 4.5% (1.8-10.6)                 |                                     |                |
| Not every day but >once a week                                |                             | 31.1% (22.8-40.7)               |                                     |                |
| Once a week                                                   |                             | 38.9% (29.9-48.6)               |                                     |                |
| Less than once a week but >once a month                       |                             | 14.3% (8.8-22.4)                |                                     |                |
| Once a month                                                  |                             | 11.3% (6.5-18.9)                |                                     |                |

|                         |                                         |                   |                    |                        |                |
|-------------------------|-----------------------------------------|-------------------|--------------------|------------------------|----------------|
| <b>Jogging</b>          |                                         |                   |                    |                        | 0.1119         |
|                         | Every day                               | 8.5% (4.1-16.9)   | 9.5% (3.9-21.1)    | 7.4% (2.1-23.5)        |                |
|                         | Not every day but >once a week          | 46.8% (37.2-56.7) | 34.5% (23.6-47.2)  | 61.7% (46.6-74.8)      |                |
|                         | Once a week                             | 18.7% (11.9-28.2) | 23.9% (13.5-38.8)  | 12.5% (6.0-24.0)       |                |
|                         |                                         | <b>All men</b>    | <b>Footballers</b> | <b>Non-Footballers</b> |                |
| <b>Factors</b>          |                                         | <b>(95% CI)</b>   | <b>(95% CI)</b>    | <b>(95% CI)</b>        | <b>p-value</b> |
|                         | Less than once a week but >once a month | 17.6% (10.7-27.4) | 22.0% (11.9-37.1)  | 12.2% (5.6-24.9)       |                |
|                         | Once a month                            | 8.3% (4.5-14.9)   | 10.1% (4.6-20.7)   | 6.2% (2.3-15.9)        |                |
| <b>Gym/ health club</b> |                                         |                   |                    |                        | 0.9450         |
|                         | Every day                               | 13.5% (7.7-22.8)  | 13.2% (5.1-29.9)   | 13.9% (6.8-26.3)       |                |
|                         | Not every day but >once a week          | 60.7% (49.3-71.1) | 56.9% (38.6-73.6)  | 64.0% (48.8-76.8)      |                |
|                         | Once a week                             | 10.4% (5.3-19.3)  | 10.8% (4.0-23.7)   | 1.0% (4.0-23.0)        |                |
|                         | Less than once a week but >once a month | 10.5% (5.1-20.4)  | 12.6% (4.3-31.6)   | 8.7% (3.2-21.3)        |                |
|                         | Once a month                            | 4.9% (1.7-13.3)   | 6.5% (1.9-19.8)    | 3.5% (0.5-21.7)        |                |
| <b>Cycling</b>          |                                         |                   |                    |                        | 0.5208         |
|                         | Every day                               | 20.4% (12.2-32.1) | 25.4% (13.8-42.1)  | 13.6% (4.8-32.9)       |                |
|                         | Not every day but >once a week          | 29.9% (20.2-41.9) | 23.4% (12.3-39.9)  | 38.7% (23.1-57.0)      |                |
|                         | Once a week                             | 13.9% (7.8-23.5)  | 11.1% (4.8-23.7)   | 17.7% (7.6-35.8)       |                |
|                         | Less than once a week but >once a month | 23.1% (13.8-35.9) | 25.6% (12.7-44.9)  | 19.7% (9.1-37.4)       |                |
|                         | Once a month                            | 12.7% (6.1-24.5)  | 14.5% (5.6-32.5)   | 10.4% (3.4-27.6)       |                |
| <b>Swimming</b>         |                                         |                   |                    |                        | 0.4525         |
|                         | Every day                               | 2.4% (0.6-9.6)    | 0.0%               | 4.3% (1.0-16.2)        |                |
|                         | Not every day but >once a week          | 13.4% (7.3-23.4)  | 7.6% (2.2-23.0)    | 17.8% (8.8-32.8)       |                |
|                         | Once a week                             | 23.5% (13.9-36.8) | 23.2% (11.4-41.6)  | 23.7% (11.9-41.8)      |                |
|                         | Less than once a week but >once a month | 36.2% (24.9-49.3) | 38.0% (21.4-58.0)  | 34.8% (51.4-21.2)      |                |
|                         | Once a month                            | 24.5% (15.1-37.2) | 31.1% (15.7-52.2)  | 19.5% (9.4-35.9)       |                |
